1 **Running head:** Pear flower microbiome

2

3 **Orchard Management and Landscape Context Mediate the Floral Microbiome of Pear**

4

5 Robert N. Schaeffer<sup>a,†,#</sup>, Vera W. Pfeiffer<sup>b,†</sup>, Saumik Basu<sup>b</sup>, Matthew Brousil<sup>b</sup>, Christopher  
6 Strohm<sup>c</sup>, S. Tianna DuPont<sup>c</sup>, Rachel L. Vannette<sup>d</sup>, and David W. Crowder<sup>b</sup>

7

8 <sup>a</sup>Department of Biology, Utah State University, Logan, UT 84322

9 <sup>b</sup>Department of Entomology, Washington State University, Pullman, WA 99164

10 <sup>c</sup>Tree Fruit Research and Extension Center, Washington State University, Wenatchee, WA

11 98801

12 <sup>d</sup>Department of Entomology & Nematology, University of California Davis, Davis, CA 95616

13 <sup>†</sup>R.N.S. and V.W.P. contributed equally to this work.

14

15 **#Correspondence:**

16 Robert N. Schaeffer

17 robert.schaeffer@usu.edu

18

19 **ABSTRACT**

20 Crop-associated microbiota are key factors affecting host health and productivity. Most crops are  
21 grown within heterogeneous landscapes, and interactions between management practices and  
22 landscape context often affect plant and animal biodiversity in agroecosystems. However,  
23 whether these same factors typically affect crop-associated microbiota is less clear. Here, we  
24 assessed whether orchard management strategies and landscape context affected bacterial and  
25 fungal communities in pear (*Pyrus communis*) flowers. We found that bacteria and fungi  
26 responded differently to management schemes. Organically-certified orchards had higher fungal  
27 diversity in flowers than conventional or bio-based integrated pest management (IPM) orchards,  
28 but organic orchards had the lowest bacterial diversity. Orchard management scheme also best  
29 predicted the distribution of several important bacterial and fungal genera that either cause or  
30 suppress disease, with organic and bio-based IPM best explaining the distributions of bacterial  
31 and fungal genera, respectively. Moreover, patterns of bacterial and fungal diversity were  
32 affected by interactions between management, landscape context, and climate. When examining  
33 the similarity of bacterial and fungal communities across sites, both abundance- and taxa-related  
34 turnover were mediated primarily by orchard management scheme and landscape context, and  
35 specifically the amount of land in cultivation. Our study reveals local- and landscape-level  
36 drivers of floral microbiome structure in a major fruit crop, providing insights that can inform  
37 microbiome management to promote host health and high-yielding quality fruit.

38

39 **IMPORTANCE.** In tree fruits, proper crop management during bloom is essential for producing  
40 disease-free fruit. Tree fruits are often grown in heterogeneous landscapes; however, few studies  
41 have assessed whether landscape context and crop management affect the floral microbiome,  
42 which plays a critical role in shaping plant health and disease tolerance. Such work is key for  
43 identification of tactics and/or contexts where beneficial microbes proliferate, and pathogenic  
44 microbes are limited. Here, we characterize the floral microbiome of pear crops in Washington  
45 State, USA, where major production occurs in inter-mountain valleys and basins with variable  
46 elevation and microclimates. Our results show that both local (crop management) and landscape  
47 (habitat types and climate) level factors affect floral microbiota, but in disparate ways for each  
48 kingdom, suggesting a need for unique management strategies for each group. More broadly,  
49 these findings can potentially inform microbiome management in orchards for promotion of host  
50 health and high-quality yields.

51

52 **KEYWORDS.** flower microbiome, integrated pest management, landscape heterogeneity,

53 *Pyrus communis*

54 **INTRODUCTION.**

55 Microbial communities affect plant health and productivity. For agricultural crops, microbes can  
56 affect nutrient mobilization and transport, often promoting plant growth and disease resistance  
57 (Pii *et al.*, 2015; Vurukonda *et al.*, 2016; Berg and Koskella, 2018). In turn, understanding and  
58 managing microbiome assembly could enhance agricultural sustainability by reducing reliance  
59 on external inputs, enhancing yields, and potentially contributing to the maintenance of both  
60 biodiversity and the functioning of agricultural landscapes (Mueller and Sachs, 2015; Busby *et*  
61 *al.*, 2017; Toju *et al.*, 2018). Yet, despite the growing recognition of the importance of the  
62 microbiome to crop productivity, processes governing the assembly of microbiomes for many  
63 crop species are still largely unclear (but see Edwards *et al.*, 2015; Grady *et al.*, 2019).

64 Agricultural landscapes are often spatially heterogeneous. Accruing through shifts in land  
65 tenure over time, this heterogeneity reflects a landscape's composition and configuration (Fahrig  
66 and Nettle, 2005; Fahrig *et al.*, 2011; Smith *et al.*, 2020). Specifically, crop production occurs on  
67 patches of land that exist within habitat mosaics containing patches of the same crop, alternative  
68 commodities, and semi-natural vegetation. Such variation in land cover around a crop field may  
69 strongly affect local abiotic and biotic conditions. Most studies assessing the effects of spatial  
70 context, however, have focused primarily on plants (Smith *et al.*, 2020) and animals (Karp *et al.*,  
71 2018), but effects of landscape-level drivers on plant-associated microbiomes has received less  
72 attention. This is a problematic knowledge gap as microbes often disperse over long distances,  
73 and studies show that spillover of microbes from agricultural into natural habitats is affected by  
74 landscape context and dispersal ability of individual taxa (Bell and Tylianakis, 2016). Many  
75 microbes are often affected strongly by environmental conditions, and abiotic variation across  
76 landscapes can sometimes predict outbreaks of pathogenic microbes (Smith and Pusey 2010)

77           At the orchard scale, management practices employed to control pests and disease can also  
78 shape microbiome assembly and structure. Agricultural producers often rely on agrochemicals to  
79 prevent establishment or directly suppress both pests and pathogens. As part of an integrated pest  
80 management (IPM) program, these practices can vary in intensity across orchards, including the  
81 frequency of application, the active ingredients of chemical controls, and how they are coupled  
82 with other biological or cultural-control strategies (Agrios, 2005). Indeed, the application of  
83 antibiotics, fungicides, or microbiological control agents can leave distinct signatures on the  
84 microbiome associated with tree fruits (Johnson and Stockwell, 1998; Schaeffer *et al.*, 2017).  
85 Though their application can often have direct, suppressive effects on the abundance of targeted,  
86 pathogenic taxa (Johnson and Stockwell, 1998), non-target effects on associated yeasts and  
87 bacteria have also been observed (McGhee and Sundin, 2011; Schaeffer *et al.*, 2017).

88           Here, we assessed how local- and landscape-level processes affected the diversity and  
89 structure of microbe communities associated with pear (*Pyrus communis*) flowers in Washington  
90 State, USA. We focused on microbes on flowers, as these ephemeral structures produce the fruit,  
91 but are also the primary infection site for pathogens such as the bacterium *Erwinia amylovora*,  
92 the causal agent of fire blight (Vanneste 2000). As a consequence, pear orchards are typically  
93 heavily managed during bloom to minimize disease risk while promoting pollination (McGregor  
94 1976, Johnson and Stockwell 1998). Such management tactics range from the use of managed  
95 honey bees, to application of diverse bactericides for control of fire blight. We predicted that  
96 floral microbiota would be impacted by orchard management practices and the abiotic and biotic  
97 landscape conditions. Such work provides important insights into microbial colonization and  
98 community structure pre- and post-pollination, important windows for production.

99

## 100 **RESULTS**

101 **Pear flower microbiome.** Our study sampled bacterial and fungal communities associated with  
102 pear flowers across 15 orchards with three management types (conventional, bio-based IPM, and  
103 organic; 5 sites of each). After quality-filtering and processing, we detected 142 bacterial and  
104 1703 fungal amplicon sequence variants (ASVs) from the pear flowers. The bacterial community  
105 was dominated by members of the *Bacillaceae*, *Enterobacteriaceae*, *Lactobacillaceae*, and  
106 *Pseudomonadaceae* (Fig. 1A), with each family comprising on average, 22%, 15%, 9%, and 9%  
107 of sequences, respectively. Beneficial bacteria previously found to be associated with disease  
108 suppression in this system (i.e., *Bacillus*, *Pantoea*, and *Pseudomonas*) comprised ~11% of taxa  
109 (ASVs) observed, and ~41% of the relative abundance. The fungal community was dominated  
110 by members of *Aureobasidiaceae*, *Cladosporiaceae*, *Mycosphaerellaceae*, and *Sclerotiniaceae*  
111 (Fig. 1B), with each family comprising on average, 16%, 8%, 14%, and 7% of sequences,  
112 respectively. Of the *Aureobasidiaceae*, four ASVs were identified to the species level as  
113 *Aureobasidium pullulans*, a beneficial fungus used for biological control of fire blight. Twenty-  
114 one additional ASVs were identified as belonging to genera *Botrytis*, *Cladosporium*, *Monilinia*,  
115 *Mycosphaerella*, or *Penicillium*, potentially important agents of pre- and post-harvest disease.  
116

## 117 **Orchard management and landscape context affect bacterial and fungal alpha diversity.**

118 Orchard pest management practices were significantly associated with pear flower bacterial and  
119 fungal diversity (Shannon Index) (Table 1). Considered alone, conventional and bIPM-managed  
120 orchards were found to have ~60% higher bacterial diversity than those managed organically  
121 (Fig. 2A), while organically managed orchards exhibited the highest fungal diversity (Fig. 2B).  
122 Yet, the positive effects of organic management on fungal diversity were not significant in the

123 multiple variate linear model when controlling for land cover and climate. In these linear  
124 regression models, both organic and bIPM-management styles reduced bacterial and fungal  
125 diversity, although the negative influence of organic management on fungal diversity was weak.  
126 Land cover was also associated with bacterial and fungal diversity: bacterial diversity declined  
127 with increasing proportion of habitat containing forest or pear, while fungal diversity increased  
128 with pear crop cover. Microclimatic conditions were also associated with both bacterial and  
129 fungal diversity, though minimum temperature was the only variable of significant effect on  
130 fungi, and minimum VPD was for bacteria in the top AIC selected model (Table 1).

131  
132 **Orchard management practices drive the distribution of pathogenic fungal species and the**  
133 **presence of bacterial genera associated with disease suppression.** Focal bacterial and fungal  
134 genera of concern were first investigated to assess the scale of spatial autocorrelation, as well as  
135 potential associations with aspects of landscape context. Positive spatial autocorrelation was  
136 exhibited for each of the nine taxa examined, but only at the shortest distances of less than 1 km.  
137 Using canonical correlation analysis to assess how landscape and management variables were  
138 associated with the microbial species composition, we found significant associations between  
139 predictors and bacterial (Table S1; Pillai's trace  $P = 0.014$ ) and fungal communities (Table S2;  
140 Pillai's trace  $P = 0.005$ ) (Fig. 3). The three bacterial genera associated with disease suppression  
141 were distributed very differently in association with the factors of interest. More specifically, the  
142 relative abundance of *Bacillus*, a bacteria commonly applied to suppress disease in pear, was  
143 most strongly associated with organic management (Fig. S1), followed closely by the amount of  
144 surrounding forest, and then geographic distance. These top factors, aligned with Axis 1, were  
145 negatively associated with *Pseudomonas*, while bIPM was the most important predictor of

146 *Pantoea* (more aligned with Axis 2). Similar to *Pantoea*, bIPM (+) and organic management (-)  
147 best predicted the presence of *Aureobasidium*, a beneficial fungi aligned with Axis 1, and  
148 *Monilinia* to a lesser degree. Minimum temperature (+) and minimum VPD (+) best predicted  
149 *Botrytis*, *Cladosporium*, and *Mycosphaerella*, as well as *Monilinia* (-), all pathogenic fungi of  
150 concern for pears. Finally, the proportion of forest in the landscape, and geographic distance,  
151 were associated with the distribution of these fungal genera of interest (Table S2).

152

### 153 **Microbial beta diversity was affected by orchard management and landscape context.**

154 Overall bacterial community similarity, and turnover of specific taxa across orchards, was best  
155 predicted by geographic distance between orchards and orchard management (Fig. 4; Table 2). In  
156 other words, sites that were located nearby, or had the same management scheme, tended to be  
157 most similar in terms of community composition. In contrast, abundance-related turnover across  
158 sites was affected mainly by the proportion of landscape under fruit cultivation, namely apple.  
159 With respect to fungi (Fig. 4; Table 3), turnover of fungal communities across sites was  
160 associated with the amount of pear production in the landscape, temperature, and vapor pressure  
161 deficit (VPD). Temperature and VPD, along with surrounding forest, were important drivers of  
162 taxa-related turnover. In contrast, abundance-related community turnover was associated with  
163 geographic distance and the proportion of landscape represented by forest around orchards.

164

## 165 **DISCUSSION**

166 The Pacific Northwest is responsible for ~80% of pear production in the United States (USDA  
167 NASS 2019). Pre- and post-harvest diseases that can take hold during bloom threaten production  
168 and the quality of yield, however. Here, we investigated how local, orchard-level IPM practices



169 interacted with landscape-level growing conditions to influence the structure and diversity of  
170 microbiota associated with pear flowers, potential sites for infection. Our analyses revealed that  
171 orchard management scheme can significantly influence the structure and diversity of both  
172 bacterial and fungal communities. Beyond local, orchard-level management, land cover and  
173 climate were also found to be significant predictors of microbe diversity, and bacterial and  
174 fungal communities were sensitive to different habitat types found in landscapes surrounding  
175 orchards. Finally, fungal alpha and beta diversity were far more sensitive than bacteria to  
176 microclimatic conditions experienced in orchards. In the sections that follow, we discuss these  
177 findings in light of understanding the key drivers of floral microbiome structure in this system.  
178

179 **Orchard management mediates microbial diversity.** Bacterial and fungal alpha diversity  
180 responded differently to orchard management scheme. Bacterial diversity was significantly  
181 higher in conventional and bIPM orchards compared to organic orchards; however, the opposite  
182 pattern was observed for fungi. Organic orchards had a high relative abundance of *Bacillus*,  
183 likely because of its application as a biological control agent. The strong effect of orchard  
184 management on bacterial diversity suggests that application of *Bacillus* reduced bacterial  
185 diversity, which may occur through resource competition, priority effects, or mass effects.  
186 *Bacillus* species have shown promise in limiting the establishment and development of the  
187 bacterial pathogen *E. amylovora*, the causal agent of fire blight (Sundin *et al.*, 2009; Shemshura  
188 *et al.*, 2020), and may also affect other floral microbes. Indeed, increased fungal diversity in  
189 organically-managed orchards could be a consequence of *Bacillus* application, although we were  
190 unable to directly assess if fungal abundance was affected in our study. In contrast to bacteria  
191 applied for biological control, we observed that *Aureobasidium* had a higher relative abundance

192 in conventional and bIPM orchards than organic ones (where it was applied in one orchard for  
193 biological control). Background levels of some microbial taxa may be high and more prevalent  
194 in the presence of particular landscape and climate conditions (e.g., higher precipitation and high  
195 proportion of forest; Tables S1 and S2). These patterns may represent preferential use of these  
196 biological treatments across orchards in our survey. Though unable to confirm whether ASVs  
197 recovered in our dataset are these exact commercial strains, biologicals applied to pear flowers  
198 often have a high recovery rate in surveys (Stockwell *et al.*, 2002; Johnson and Temple, 2013).

199

200 **Land cover and microclimate shape microbial diversity.** Our results show that habitat patches  
201 with alternate tree fruit crops (apple, cherry) were negatively associated with both bacterial and  
202 fungal diversity on pear flowers, and appeared to be primary drivers of microbial community  
203 structure (Tables 2-3). Pear orchards in the Wenatchee River Valley are primarily located in  
204 narrow, inter-mountain areas with highly variable elevation and land cover, including forest,  
205 additional pear orchards, and those dedicated to production of other deciduous fruits, namely  
206 apple. Vegetation in and around orchards can be an important source of inocula via airborne  
207 dispersal (Lindow and Andersen, 1996; Lympelopoulou *et al.*, 2016). Furthermore, previous  
208 work on apple and pear flowers has revealed considerable overlap in the identity of microbes  
209 associated with each host species (Stockwell *et al.*, 1999; Pusey *et al.*, 2009; Smessaert *et al.*,  
210 2019). Such overlap, in addition to a reduction in diversity with increasing land cultivation,  
211 suggests a role for several key processes in shaping floral microbiomes in tree fruits. First, there  
212 is a high degree of shared usage of disease and pest management practices employed in pear and  
213 apple production systems, as both can suffer greatly from fire blight disease. Inputs applied in  
214 conventional and bIPM orchards, including antibiotics and fungicides (Table S3) can act as

215 strong environmental filters on potential floral colonists (McGhee and Sundin, 2011; Schaeffer *et*  
216 *al.*, 2017), or serve as a source for inocula when applied as biologicals, as observed in organic  
217 orchards. Second, both apple and pear systems rely considerably on honey bees (*Apis mellifera*)  
218 for pollination, which are known to leave a distinct imprint on floral microbiome diversity  
219 (Aizenberg-Gershtein *et al.*, 2013). Increased reliance on a single pollinator species, combined  
220 with chemical and non-chemical inputs, are likely important contributors to patterns observed.

221  
222 **Bacterial and fungal community turnover and dispersal.** Orchard management scheme was a  
223 key determinant of bacterial community similarity across sites; however, other predictors often  
224 explained high levels of variance in community structure across sites. In particular, geographic  
225 distance explained a significant amount of variance in both whole-community and taxa-related  
226 beta-diversity of bacteria. In contrast, for fungi, spatial distance was a significant predictor of  
227 only abundance-related turnover. Beyond distance, climatic conditions contributed significantly  
228 to explained variance in the beta-diversity of fungal communities. In particular, VPD and  
229 temperature were negatively associated with fungal diversity, suggesting both microclimate  
230 variables affecting either species-specific patterns of growth and/or competition. Moisture  
231 availability is also an important determinant of microbial growth on the surface of plant tissues  
232 (Beattie 2002), with free water and humidity often being necessary for conidial germination,  
233 germ tube growth, and potential penetration of plant tissues, including floral organs. This has  
234 been frequently observed in other flowering systems of commercial value, including blueberries  
235 (Ngugi and Scherm, 2004), raspberries (McNicol *et al.*, 1985), strawberries (Bulger *et al.*, 1987),  
236 and cut roses (Muñoz *et al.*, 2019). Within these systems, infection of the gynoecium can be a  
237 primary route of disease development. Alternatively, infection of petals and other organs can

238 facilitate secondary infections of fruits (Petrasch *et al.*, 2019). Of the fungal genera examined in  
239 our study, *Botrytis* has been documented to successfully infect the mesocarp via stamen  
240 filaments (de Kock and Holz, 1992). For the others of interest, it is unclear if there is a link  
241 between flower colonization and resulting development and pre- and post-harvest diseases.

242 More broadly, our results provide insight into local- and landscape-level drivers of floral  
243 microbiome diversity in an important tree fruit commodity, pear. Given the critical link between  
244 flowers, yield, and disease, identifying such drivers across both spatial and temporal scales could  
245 improve the understanding of links between management, host microbiome structure, and  
246 potentially disease resistance or susceptibility. With growing appreciation for the role of host  
247 microbiota in affecting resistance against disease (Berg and Koskella, 2018; Vannier *et al.*,  
248 2019), such information has potential to inform development of sustainable management  
249 practices in many different types of agroecosystems.

250

## 251 **MATERIALS AND METHODS**

252 **Landscape survey.** We surveyed 15 orchards throughout the Wenatchee River Valley of  
253 central Washington, USA (Fig. 5) in spring 2018. Within the United States, Washington State is  
254 the leading producer of deciduous tree fruit crops such as apples, pears, and cherries. These, as  
255 well as other commodities, are grown in variable inter-mountain river valleys and basins east of  
256 the Cascade mountains. These production areas generally experience temperate, dry conditions,  
257 in addition to favorable access to irrigation water originating from streams and rivers fed by  
258 snowmelt (Smith, 2000). Given the diverse topography of this region, however, individual  
259 orchards range in elevation from 20 to 1000 m above sea level (Smith, 2000). Key stages of fruit  
260 production, such as flower bloom, can thus experience considerable variation in microclimatic

261 conditions among orchards, affecting bloom timing, fertilization, and fruit development (Logan  
262 *et al.*, 2000; Lopez and DeJong, 2007). As flowers are habitat for diverse microbiota (Vannette,  
263 2020), including a number of pathogenic species that cause pre- and post-harvest diseases of tree  
264 fruits (Ngugi and Scherm, 2006), microclimatic conditions could affect habitat quality, as well as  
265 colonization dynamics and the resulting structure of the floral microbiome.

266 Our survey assesses microbe communities on orchards that used one of three management  
267 schemes, with five replicates per scheme: organically-certified, conventional, and biological  
268 based integrated pest management (bIPM) (DuPont and Strohm, 2020). With each of these broad  
269 management types, growers were not restricted to a specific spray schedule, but each used a  
270 defined set of tools for pest and disease management (Table S3; DuPont and Strohm, 2020).  
271 Conventional management followed a standard practice (e.g., application of synthetic pesticides),  
272 while organic orchards were all managed following USDA-certified organic standards, which  
273 prohibits use of such synthetic chemicals. To control fire blight, organic producers often use  
274 Serenade® Opti (Bayer CropScience, St. Louis, MO, USA) at full bloom, a bio-based fungicide  
275 and bactericide that leverages *Bacillus subtilis* (strain QST 713) endospores and its metabolic by-  
276 products as active ingredients (DuPont *et al.*, 2019). Serenade® is not the only bio-based product  
277 leveraged by producers for control of fire blight in pear, however, and other products such as  
278 Blossom Protect™ (Westbridge Agricultural Products, Vista, CA, USA) can be used across  
279 organic, bIPM, and conventional schemes. Blossom Protect™ is derived from air-dried spores of  
280 *Aureobasidium pullulans* (strains DSM 14940 and 14941), an epiphytic or endophytic fungus  
281 associated with a wide range of plant species, including many tree fruits (Kunz 2006, Kunz *et al.*  
282 2008, Leibinger *et al.* 1997). For those orchards that employed the bIPM scheme, growers used a  
283 toolbox of cultural controls combined with pesticides with less documented negative impact on

284 natural enemies and other beneficial organisms. Such products included lime sulfur, kaolin,  
285 spinosad, and biologicals, applied at various stages of bloom stage (DuPont and Strohm, 2020).

286 Orchards were sampled once at peak bloom, either on April 30<sup>th</sup> or May 1<sup>st</sup> of 2018. At  
287 each orchard, 10 trees ('Bradford' variety) were sampled: five near the edge of the orchard and  
288 five in the interior. We chose this approach because previous studies suggest that semi-natural  
289 habitat in the surrounding landscape can both support and increase rates of visitation by native  
290 pollinators such as bees and flies (Klein *et al.*, 2012). Moreover, pollinators can be important  
291 dispersal agents for microbes (Aizenberg-Gershtein *et al.*, 2013; Vannette and Fukami, 2017);  
292 thus, our aim was to detect potential contributions of pollinator visitation to flower microbiome  
293 assembly in orchards. For each site (i.e., edge or interior) and sampling event, 50 open flowers  
294 ( $N = 10$  per tree) were collected using aseptic technique and pooled at the site level. Flowers with  
295 flat, fully-reflexed petals that had been open for ~3 days were collected. Once collected, flowers  
296 were placed in a cooler and transferred to the lab, then stored at 4°C until processing.

297

298 **Sample processing.** In a laboratory, whole flowers were washed with 20 mL of 1x-0.15% PBS-  
299 Tween solution, and samples were sonicated for 10 min to dislodge epiphytic microbes. After  
300 sonication, floral tissue debris was removed from sample tubes by pouring samples through  
301 autoclaved cheesecloth into a new, sterile Falcon tube. Falcon tubes containing debris-filtered  
302 samples were centrifuged at 3000 rpm for 10 min at 4°C to pellet microbial cells. We poured off  
303 the supernatant, re-suspended microbial cell pellets in 1 mL of autoclaved PBS solution,  
304 vortexed tubes, then transferred the cell suspensions to new 1.7 mL microcentrifuge tubes.

305

306 **DNA extraction and sequencing.** Genomic DNA was extracted from samples using a  
307 ZymoBIOMICS® DNA Microprep kit (Zymo Research, Irvine, CA, USA) following the  
308 manufacturer's protocol. Extracted DNA was then used as template for library preparation and  
309 amplicon sequencing following Comeau et al. (2017), performed at the Centre for Comparative  
310 Genomics and Evolutionary Bioinformatics at Dalhousie University (Halifax, Nova Scotia,  
311 Canada). There, amplicon fragments were PCR-amplified from DNA in duplicate, using separate  
312 template dilutions (1:1 & 1:10) and high-fidelity Phusion polymerase (New England BioLabs  
313 Inc., Ipswich, MA, USA). A single round of PCR was performed using "fusion primers"  
314 (Illumina adaptors + indices + specific regions) targeting either the 16S V4-V5 (Bacteria;  
315 Primers: 515FB and 926R; Parada *et al.* 2015; Walters *et al.* 2015) or ITS2 (Fungi; Primers:  
316 ITS86 and ITS4; Op De Beeck *et al.* 2014) regions with multiplexing. PCR products were  
317 verified visually by running a high-throughput Invitrogen 96-well E-gel (Thermo Fisher  
318 Scientific Corp., Carlsbad, CA, USA). Any samples with failed PCRs (or spurious bands) were  
319 re-amplified by optimizing PCR conditions to produce correct bands to complete a sample plate  
320 before continuing with sequencing. The PCR reactions from the same samples were pooled in  
321 one plate, cleaned, and then normalized using the high-throughput Invitrogen SequelPrep 96-  
322 well Plate Kit (Thermo Fisher Scientific Corp.). Samples were then pooled to make one library,  
323 then quantified fluorometrically before sequencing. Amplicon samples were then run on an  
324 Illumina MiSeq using 300+300 bp paired-end V3 chemistry. Raw sequences are available on the  
325 NCBI Short Read Archive (SRA) under BioProject PRJNA659266.

326 Demultiplexed sequences were trimmed of trailing low-quality bases using the *DADA2*  
327 pipeline (v.1.8.0; Callahan *et al.*, 2016) in R (v. 3.5.2; R Core Team, 2013). Paired-end reads  
328 were then quality-filtered, error-corrected, and assembled into ASVs. Once assembled, chimeras

329 were detected, removed, and taxonomic information was then assigned to each ASV using the  
330 RDP Naïve Bayesian Classifier (Wang *et al.*, 2007) trained to either the RDP training set (v.14)  
331 or UNITE general fasta release (v.7.2) for bacteria or fungi respectively. ASVs that failed to  
332 classify to kingdom, or identified as chloroplast or mitochondrial sequences, were discarded.  
333 Further, potential contaminant ASVs were identified through inclusion of negative controls  
334 during sample and sequence processing, and then removed using the ‘prevalence’ method with  
335 the *decontam* package in R (Davis *et al.*, 2018). This filtering resulted in samples sequenced at a  
336 mean depth of 43,057 sequences per sample for bacteria and 25,890 for fungi. Samples were then  
337 rarefied (bacteria: 49; fungi: 14,920), with all but one bacterial sample (19orgedge) retained in  
338 the analyses that follow. Such a low cutoff for bacteria is consequence of a large proportion of  
339 reads being identified as plastid DNA, which were removed from the dataset. Despite this, we  
340 included bacterial data in our study because sampling curves indicate that we were able to  
341 identify the majority of bacterial taxa present in samples (Supplementary material, Fig. S2).  
342 Moreover, previous characterization of microbial communities associated with flowers has  
343 frequently observed low species richness (Vannette 2020).

344

345 **Landscape context.** Land cover within a 1 km buffer of each study orchard was classified into  
346 three habitat types: (i) pear orchard, (ii) other fruit orchard (apple and cherry), and (iii) forest.  
347 These classifications were performed using the cropland data layer spatial product (USDA  
348 2018). Across our study region, pears were the dominant agricultural crop, although the habitat  
349 around individual study sites varied widely from 2 to 66% pear orchards. Other fruit crops had  
350 less variability, with 0 to 6% of surrounding land cover, while forest land was highly variable  
351 and ranged from 0 to 46%. Forest patches were primarily composed of evergreen trees.



352 To assess the role of abiotic factors, high resolution climatic metrics for each site were  
353 obtained from publicly accessible PRISM data in April 2018. PRISM data is collected at a spatial  
354 resolution of 2.5 arcmin (~4km). PRISM data used included elevation, min and max temperature,  
355 min and mix vapor pressure deficit (VPD) and precipitation. Vapor pressure deficit is the  
356 difference between the amount of moisture in the air and how much moisture the air can hold  
357 when saturated, where high VPD indicates drier conditions. As with land cover, the abiotic  
358 conditions where sites were located were variable, with elevation ranging from 1152 to 1526 m  
359 above sea level, April precipitation ranging from 4.2 to 5.3 cm, minimum temperatures ranging  
360 from 2.4 to 3.7 °C, and maximum temperature ranging from 13.6 to 15.7 °C.

361  
362 **Statistical analyses.** We used multivariate linear regression to assess effects of land cover,  
363 orchard management, and climate on alpha diversity (Shannon diversity index) and dominance  
364 of pear-flower microbiomes. All analyses were conducted using R v. 3.6.1 (R Core Team 2013).  
365 To reduce multicollinearity among predictors, we calculated variance inflation factors (VIFs) and  
366 used to a threshold of 10 to eliminate variables with problematic covariance. This eliminated  
367 temperature, precipitation, and elevation from the alpha diversity models. We calculated multi-  
368 model average coefficients based on the 90% confidence interval of top models as well as the  
369 importance of each coefficient, which indicated the number of top models in which it appeared.

370 We also assessed effects of landscape, climate, and farm management on the dominance  
371 (relative abundance) of a few focal genera that are highly important for pre- and post-harvest  
372 diseases of pear—including putative pathogens and beneficial taxa. These included fungal genera  
373 *Aureobasidium*, *Botrytis*, *Cladosporium*, *Monilinia*, *Mycosphaerella*, *Penicillium*, and beneficial  
374 bacteria including *Bacillus*, *Pantoea*, and *Pseudomonas*. One ASV (BactSeq29) identified as an

375 *Erwinia* sp. was detected at a single orchard in our survey. Given such limited detection, we  
376 were unable to perform an analysis of links between variables of interest and *Erwinia* presence  
377 and abundance. However, to examine associations between microbial genera and predictors  
378 described earlier, we used canonical correlation analysis (CCA), an extension of linear regression  
379 that finds linear relationships between combinations of explanatory and response variables which  
380 maximize the correlation. Separate models were run on fungi and bacteria of interest.

381 Differences in species composition among sites could be affected by processes including  
382 substitution of taxa, or variation in abundance of particular taxa, so we further evaluated the  
383 effects of farm management, land cover, and climate variables on abundance-related and taxa-  
384 related aspects of community turnover (microbial beta diversity), and the overall community  
385 dissimilarity (which incorporates both processes). Beta diversity was partitioned into abundance-  
386 related and taxa-related components of Bray-Curtis dissimilarity using the ‘bray.part’ function in  
387 the ‘betapart’ R package. The influence of explanatory variables on these two components of  
388 community turnover between sites, as well as their cumulative overall Bray-Curtis dissimilarity  
389 was investigated using Restricted Distance-based Analysis (RDA) and AIC model selection,  
390 executed using the ‘capscale’ and ‘ordiR2step’ functions in the ‘vegan’ R package. The variance  
391 explained by factors included in the top AIC selected models are included in the results.

392

### 393 **ACKNOWLEDGMENTS**

394 We are especially grateful to the growers who allowed us to sample on their properties, and DFJ  
395 Sauza for assistance with data analysis. This work was funded by USDA NIFA grants (2014-  
396 51106-22096, DW; 2017-67012-26104, RS), Western SARE (SW18-031; DW and RS), the  
397 WSDA (#K1986; SD), and the WSU BioAg program.

## 398 REFERENCES

- 399 Agrios, G.N. (2005) Plant Pathology, Academic press.
- 400 Aizenberg-Gershtein, Y., Izhaki, I., and Halpern, M. (2013) Do honeybees shape the bacterial  
401 community composition in floral nectar? *PLOS ONE* **8**: e67556.
- 402 Bell T, Tylianakis JM (2016) Microbes in the anthropocene: spillover of agriculturally selected  
403 bacteria and their impact on natural ecosystems. *Proc Royal Society London Series B*  
404 **283**: 20160896.
- 405 Berg, M. and Koskella, B. (2018) Nutrient-and dose-dependent microbiome-mediated protection  
406 against a plant pathogen. *Curr Biol* **28**: 2487-2492. e3.
- 407 Bulger, M.A., Ellis, M.A., and Madden, L.V. (1987) Influence of temperature and wetness  
408 duration on infection of strawberry flowers by *Botrytis cinerea* and disease incidence of  
409 fruit originating from infected flowers. *Phytopathology* **77**: 1225–1230.
- 410 Busby, P.E., Soman, C., Wagner, M.R., Friesen, M.L., Kremer, J., Bennett, A., et al. (2017)  
411 Research priorities for harnessing plant microbiomes in sustainable agriculture. *PLOS*  
412 *Biol* **15**: e2001793.
- 413 Callahan, B.J., McMurdie, P.J., Rosen, M.J., Han, A.W., Johnson, A.J.A., and Holmes, S.P.  
414 (2016) DADA2: high-resolution sample inference from Illumina amplicon data. *Nat*  
415 *Methods* **13**: 581–583.
- 416 Davis, N.M., Proctor, D.M., Holmes, S.P., Relman, D.A., and Callahan, B.J. (2018) Simple  
417 statistical identification and removal of contaminant sequences in marker-gene and  
418 metagenomics data. *Microbiome* **6**: 226.
- 419 DuPont, S.T. and John Strohm, C. (2020) Integrated pest management programmes increase  
420 natural enemies of pear psylla in Central Washington pear orchards. *J Appl Entomol* **144**:  
421 109–122.
- 422 Edwards, J., Johnson, C., Santos-Medellín, C., Lurie, E., Podishetty, N.K., Bhatnagar, S., et al.  
423 (2015) Structure, variation, and assembly of the root-associated microbiomes of rice.  
424 *Proc Natl Acad Sci* **112**: E911–E920.
- 425 Fahrig, L., Baudry, J., Brotons, L., Burel, F.G., Crist, T.O., Fuller, R.J., et al. (2011) Functional  
426 landscape heterogeneity and animal biodiversity in agricultural landscapes. *Ecol Lett* **14**:  
427 101–112.
- 428 Fahrig, L. and Nettle, W.K. (2005) Population ecology in spatially heterogeneous environments.  
429 In *Ecosystem function in heterogeneous landscapes*. Springer, pp. 95–118.
- 430 Grady, K.L., Sorensen, J.W., Stopnisek, N., Guittar, J., and Shade, A. (2019) Assembly and  
431 seasonality of core phyllosphere microbiota on perennial biofuel crops. *Nat Commun* **10**:  
432 1–10.
- 433 Johnson, K.B. and Stockwell, V.O. (1998) Management of fire blight: a case study in microbial  
434 ecology. *Annu Rev Phytopathol* **36**: 227–248.
- 435 Johnson, K.B. and Temple, T.N. (2013) Evaluation of strategies for fire blight control in organic  
436 pome fruit without antibiotics. *Plant Dis* **97**: 402–409.
- 437 Klein, A.-M., Brittain, C., Hendrix, S.D., Thorp, R., Williams, N., and Kremen, C. (2012) Wild  
438 pollination services to California almond rely on semi-natural habitat. *J Appl Ecol* no-no.
- 439 de Kock, S.L. and Holz, G. (1992) Blossom–end rot of pears: Systemic infection of flowers and  
440 immature fruit by *Botrytis cinerea*. *J Phytopathol* **135**: 317–327.
- 441 Lindow, S.E. and Andersen, G.L. (1996) Influence of immigration on epiphytic bacterial  
442 populations on navel orange leaves. *Appl Environ Microbiol* **62**: 2978–2987.

- 443 Logan, J., Mueller, M.A., and Searcy, M.J. (2000) Microclimates, peach bud phenology, and  
444 freeze risks in a topographically diverse orchard. *HortTechnology* **10**: 337–340.
- 445 Lopez, G. and DeJong, T.M. (2007) Spring temperatures have a major effect on early stages of  
446 peach fruit growth. *J Hort Sci Biotechnol* **82**: 507–512.
- 447 Lymperopoulou, D.S., Adams, R.I., and Lindow, S.E. (2016) Contribution of vegetation to the  
448 microbial composition of nearby outdoor air. *Appl Environ Microbiol* **82**: 3822–3833.
- 449 McGhee, G.C. and Sundin, G.W. (2011) Evaluation of kasugamycin for fire blight management,  
450 effect on nontarget bacteria, and assessment of kasugamycin resistance potential in  
451 *Erwinia amylovora*. *Phytopathology* **101**: 192–204.
- 452 McNicol, R.J., Williamson, B., and Dolan, A. (1985) Infection of red raspberry styles and  
453 carpels by *Botrytis cinerea* and its possible role in post-harvest grey mould. *Ann Appl*  
454 *Biol* **106**: 49–53.
- 455 Mueller, U.G. and Sachs, J.L. (2015) Engineering microbiomes to improve plant and animal  
456 health. *Trends Microbiol* **23**: 606–617.
- 457 Muñoz, M., Faust, J.E., and Schnabel, G. (2019) Characterization of *Botrytis cinerea* from  
458 commercial cut flower roses. *Plant Dis* **103**: 1577–1583.
- 459 Ngugi, H.K. and Scherm, H. (2006) Biology of flower-infecting fungi. *Annu Rev Phytopathol*  
460 **44**: 261–282.
- 461 Ngugi, H.K. and Scherm, H. (2004) Pollen mimicry during infection of blueberry flowers by  
462 conidia of *Monilinia vaccinii-corymbosi*. *Physiol Mol Plant Pathol* **64**: 113–123.
- 463 Petrasch, S., Knapp, S.J., Van Kan, J.A., and Blanco-Ulate, B. (2019) Grey mould of strawberry,  
464 a devastating disease caused by the ubiquitous necrotrophic fungal pathogen *Botrytis*  
465 *cinerea*. *Mol Plant Pathol* **20**: 877–892.
- 466 Pii, Y., Mimmo, T., Tomasi, N., Terzano, R., Cesco, S., and Crecchio, C. (2015) Microbial  
467 interactions in the rhizosphere: beneficial influences of plant growth-promoting  
468 rhizobacteria on nutrient acquisition process. A review. *Biol Fertil Soils* **51**: 403–415.
- 469 Pusey, P.L., Stockwell, V.O., and Mazzola, M. (2009) Epiphytic bacteria and yeasts on apple  
470 blossoms and their potential as antagonists of *Erwinia amylovora*. *Phytopathology* **99**:  
471 571–581.
- 472 R Core Team (2013) R: A Language and Environment for Statistical Computing, Vienna,  
473 Austria: R Foundation for Statistical Computing.
- 474 Schaeffer, R.N., Vannette, R.L., Brittain, C., Williams, N.M., and Fukami, T. (2017) Non-target  
475 effects of fungicides on nectar-inhabiting fungi of almond flowers. *Environ Microbiol*  
476 *Rep* **9**: 79–84.
- 477 Shemshura, O., Alimzhanova, M., Ismailova, E., Molzhigitova, A., Daugaliyeva, S., and  
478 Sadanov, A. (2020) Antagonistic activity and mechanism of a novel *Bacillus*  
479 *amyloliquefaciens* MB40 strain against fire blight. *J Plant Pathol* 1–9.
- 480 Smessaert, J., Van Geel, M., Verreth, C., Crauwels, S., Honnay, O., Keulemans, W., and  
481 Lievens, B. (2019) Temporal and spatial variation in bacterial communities of “Jonagold”  
482 apple (*Malus x domestica* Borkh.) and “Conference” pear (*Pyrus communis* L.) floral  
483 nectar. *MicrobiologyOpen* **8**: e918.
- 484 Smith, T.J. (2000) Overview of tree fruit production in the Pacific Northwest United States of  
485 America and southern British Columbia, Canada. In *IV International Symposium on*  
486 *Mineral Nutrition of Deciduous Fruit Crops* 564. pp. 25–30.
- 487 Smith, T.J., and P. L. Pusey. 2010. CougarBlight 2010 ver. 5.0: a significant update of the  
488 CougarBlight fire blight infection risk mode. *Acta Horticulturae* 896:331-338.

- 489 Smith OM, Cohen AL, Reganold JP, Jones MS, Orpet RJ, Taylor JM, Thurman JH, Cornell KA,  
490 Olsson RL, Ge Y, Kennedy CM, Crowder DW (2020) Landscape context affects the  
491 sustainability of organic farming systems. *PNAS* **117**, 2870-2878.
- 492 Stockwell, V.O., Johnson, K.B., Sugar, D., and Loper, J.E. (2002) Antibiosis contributes to  
493 biological control of fire blight by *Pantoea agglomerans* strain Eh252 in orchards.  
494 *Phytopathology* **92**: 1202–1209.
- 495 Stockwell, V.O., McLaughlin, R.J., Henkels, M.D., Loper, J.E., Sugar, D., and Roberts, R.G.  
496 (1999) Epiphytic colonization of pear stigmas and hypanthia by bacteria during primary  
497 bloom. *Phytopathology* **89**: 1162–1168.
- 498 Sundin, G.W., Werner, N.A., Yoder, K.S., and Aldwinckle, H.S. (2009) Field evaluation of  
499 biological control of fire blight in the eastern United States. *Plant Dis* **93**: 386–394.
- 500 Toju, H., Peay, K.G., Yamamichi, M., Narisawa, K., Hiruma, K., Naito, K., et al. (2018) Core  
501 microbiomes for sustainable agroecosystems. *Nat Plants* **4**: 247.
- 502 Vannette, R.L. (2020) The floral microbiome: Plant, pollinator, and microbial perspectives. *Annu*  
503 *Rev Ecol Evol Syst* **51**..
- 504 Vannette, R.L. and Fukami, T. (2017) Dispersal enhances beta diversity in nectar microbes. *Ecol*  
505 *Lett* **20**: 901–910.
- 506 Vannier, N., Agler, M., and Hacquard, S. (2019) Microbiota-mediated disease resistance in  
507 plants. *PLoS Pathog* **15**: e1007740.
- 508 Vurukonda, S.S.K.P., Vardharajula, S., Shrivastava, M., and SkZ, A. (2016) Enhancement of  
509 drought stress tolerance in crops by plant growth promoting rhizobacteria. *Microbiol Res*  
510 **184**: 13–24.
- 511 Wang, Q., Garrity, G.M., Tiedje, J.M., and Cole, J.R. (2007) Naive Bayesian classifier for rapid  
512 assignment of rRNA sequences into the new bacterial taxonomy. *Appl Environ Microbiol*  
513 **73**: 5261–5267.
- 514
- 515

516 **FIGURE LEGENDS**

517 **Figure 1.** Relative abundance (Proportion of sequences) of (A) bacterial and (B) fungal families  
518 associated with pear flowers. Flowers were collected from orchards that reflected three unique  
519 management schemes (Conventional, bIPM, Organic).

520 **Figure 2.** (A) Boxplots of Shannon diversity by orchard management style and (B) coefficients  
521 from the 90% confidence set of top multivariate models. Variable importance was evaluated as  
522 the number of models within the 90% confidence model set in which the factor was included.

523 **Figure 3.** Canonical correlation analysis of three beneficial bacteria taxa and five pathogenic  
524 fungal taxa. The left panel depicts the variance explained by the factors in the canonical axes,  
525 and the right panel depicts the variance explained by the canonical axes in the taxa of interest.

526 **Figure 4.** Restricted Distance-based Analysis of bacterial and fungal community beta diversity  
527 and explanatory variables included in the top AIC-selected RDA models. Variance explained by  
528 each factor is in Tables 2 and 3.

529 **Figure 5.** Geographic extent of survey, where fifteen pear orchards in central Washington across  
530 variable landscape contexts were sampled during peak bloom.

531 **Table 1.** Multivariate linear regression models for bacterial and fungal Shannon diversity. Top  
532 models were selected by AICc.

533 **Table 2.** Results from Restricted Distance-based Analysis (RDA) of bacterial community beta-  
534 diversity. Top model selected by AIC.

535 **Table 3.** Results from Restricted Distance-based Analysis (RDA) of fungal community beta-  
536 diversity. Top model selected by AIC.

537

538

**Table 1.** Multivariate linear regression models for bacterial and fungal Shannon diversity. Top models were selected by AICc.

| Bacteria                         |          |           |          |                                 |          |
|----------------------------------|----------|-----------|----------|---------------------------------|----------|
| Variable                         | Estimate | Std Error | <i>P</i> | Model <i>adj R</i> <sup>2</sup> | <i>P</i> |
| Intercept                        | 0.869    | 0.274     | 0.005    | 0.522                           | <0.001   |
| Organic management               | -1.728   | 0.478     | 0.002    |                                 |          |
| bIPM <sup>a</sup> management     | -0.964   | 0.369     | 0.016    |                                 |          |
| Proportion of landscape - forest | -0.597   | 0.186     | 0.004    |                                 |          |
| Proportion of landscape - pear   | -0.506   | 0.187     | 0.013    |                                 |          |
| VPD <sup>b</sup> minimum         | -0.498   | 0.281     | 0.090    |                                 |          |
| VPD maximum                      | -0.411   | 0.250     | 0.114    |                                 |          |
| Fungi                            |          |           |          |                                 |          |
| Variable                         | Estimate | Std Error | <i>P</i> | Model <i>adj R</i> <sup>2</sup> | <i>P</i> |
| Intercept                        | 0.460    | 0.294     | 0.131    | 0.426                           | 0.002    |
| Organic management               | -0.357   | 0.494     | 0.477    |                                 |          |
| bIPM management                  | -1.022   | 0.392     | 0.015    |                                 |          |
| Proportion of landscape - pear   | 0.367    | 0.153     | 0.025    |                                 |          |
| VPD maximum                      | -0.252   | 0.188     | 0.191    |                                 |          |
| Minimum temperature              | -0.411   | 0.184     | 0.035    |                                 |          |

<sup>a</sup>Biological-based Integrated Pest Management

<sup>b</sup>Vapor Pressure Deficit

539

**Table 2.** Results from Restricted Distance-based Analysis (RDA) of bacterial community beta-diversity. Top model selected by AIC.

| Whole community beta-diversity             |                           |                  |
|--------------------------------------------|---------------------------|------------------|
| Variable                                   | <i>adj R</i> <sup>2</sup> | Pr (> <i>F</i> ) |
| Orchard management scheme                  | 0.147                     | 0.002            |
| Geographic distance                        | 0.172                     | 0.026            |
| Abundance-related community beta-diversity |                           |                  |
| Proportion of landscape - fruit            | 0.594                     | 0.040            |
| Taxa-related community beta-diversity      |                           |                  |
| Orchard management scheme                  | 0.164                     | 0.002            |
| Geographic distance                        | 0.195                     | 0.026            |

**Table 3.** Results from Restricted Distance-based Analysis (RDA) of fungal community beta-diversity. Top model selected by AIC.

| Whole community beta-diversity             |           |             |
|--------------------------------------------|-----------|-------------|
| Variable                                   | adj $R^2$ | Pr ( $>F$ ) |
| Proportion of landscape - pear             | 0.170     | 0.046       |
| Minimum temperature                        | 0.092     | 0.002       |
| VPD <sup>a</sup> minimum                   | 0.132     | 0.018       |
| Abundance-related community beta-diversity |           |             |
| Geographic distance                        | 0.266     | 0.008       |
| Proportion of landscape - forest           | 0.579     | 0.002       |
| Taxa-related community beta-diversity      |           |             |
| Proportion of landscape - forest           | 0.177     | 0.046       |
| Minimum temperature                        | 0.089     | 0.002       |
| VPD minimum                                | 0.134     | 0.026       |

<sup>a</sup>Vapor Pressure Deficit



A

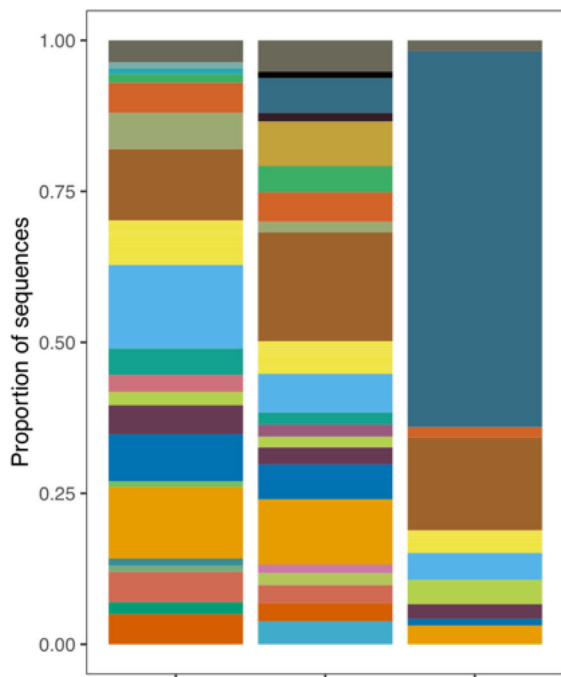

Family

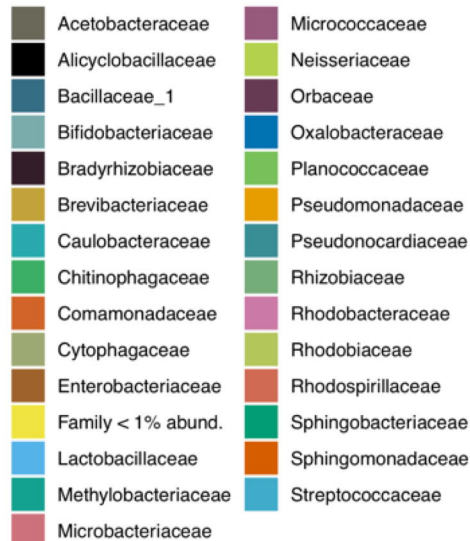

B

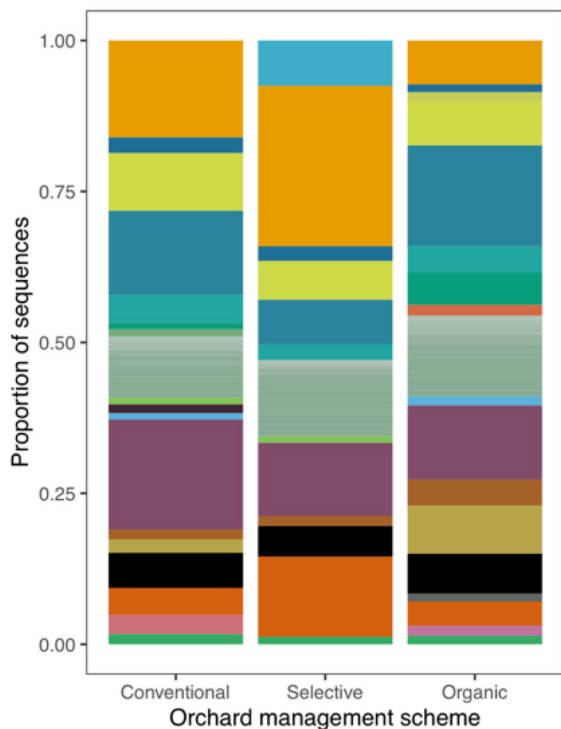

Family

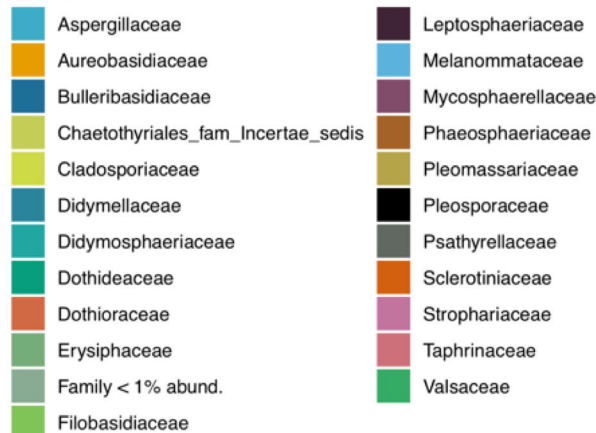

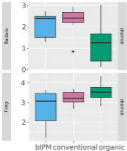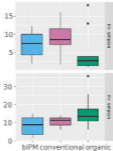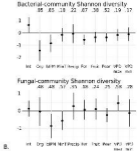

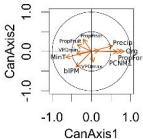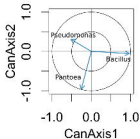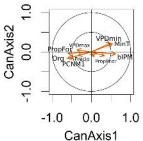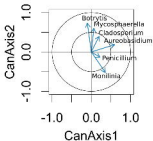

whole bacterial  
community dissimilarity

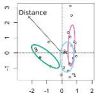

bacterial abundance  
related turnover dissimilarity

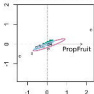

bacterial taxa-replacement  
related turnover dissimilarity

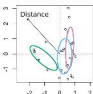

bIPM  
Conventional  
Organic

whole fungal  
community dissimilarity

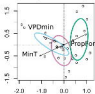

fungal abundance  
related turnover dissimilarity

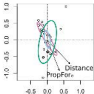

fungal taxa-replacement  
related turnover dissimilarity

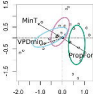

# Study orchards

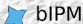

bIPM

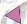

Conventional

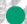

Organic

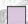

Pear Orchards

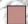

Apple & Cherry  
Orchards

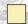

Shrubland

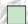

Coniferous forest

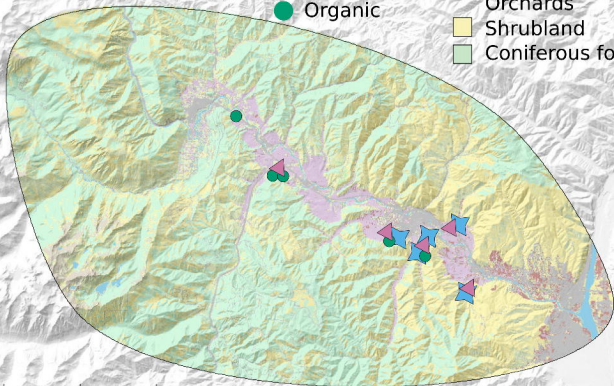

0 5 10 km

Wenatchee,  
Washington, USA
